1 **Genetic diversity and domestication of hazelnut (*Corylus avellana*) in Turkey**

2

3 Andrew J. Helmstetter<sup>1,2\*</sup>, Nihal Oztolan-Erol<sup>3</sup>, Stuart J. Lucas<sup>3</sup> and Richard J. A. Buggs<sup>1,4</sup>

4

5 <sup>1</sup>Jodrell Laboratory, Royal Botanic Gardens, Kew, Richmond, Surrey, TW9 3AB, UK;

6 <sup>2</sup>Institut de Recherche pour le Développement (IRD), UMR-DIADE, Montpellier, France;

7 <sup>3</sup>Sabancı University Nanotechnology Research and Application Center (SUNUM), Sabancı

8 University, Orhanlı, 34956 Tuzla, Istanbul, Turkey; <sup>4</sup>School of Biological and Chemical

9 Sciences, Queen Mary University of London, London E1 4NS, UK

10

11 Author for correspondence:

12 *Andrew J. Helmstetter*

13 *Tel: 0033752678852*

14 *Email: [andrew.j.helmstetter@gmail.com](mailto:andrew.j.helmstetter@gmail.com)*

15

|                        |      |                                      |                           |
|------------------------|------|--------------------------------------|---------------------------|
| Total:                 | 6344 | No. of figures:                      | 6 (1-6 in colour)         |
| Summary:               | 200  | No. of tables:                       | 0                         |
| Introduction:          | 972  | No. of supporting information files: | 7 (Table S1-3, Fig. S1-4) |
| Materials and Methods: | 1196 |                                      |                           |
| Results:               | 2014 |                                      |                           |
| Discussion:            | 1938 |                                      |                           |
| Conclusion:            | 182  |                                      |                           |
| Acknowledgments:       | 42   |                                      |                           |

16

17

18

19

20

21

22

23

24

25

26 SUMMARY

27

- 28 • Assessing and describing genetic diversity in crop plants is a crucial first step towards  
29 their improvement. The European hazelnut, *Corylus avellana*, is one of the most  
30 economically important tree nut crops worldwide. It is primarily produced in Turkey  
31 where rural communities depend on it for their livelihoods. Despite this we know little  
32 about hazelnut's domestication history and the genetic diversity it holds.
- 33 • We use double digest Restriction-site Associated DNA (ddRAD) sequencing to  
34 produce genome-wide dataset containing wild and domesticated hazelnut. We  
35 uncover patterns of population structure and diversity, determine levels of crop-wild  
36 gene flow and estimate the timing of key divergence events.
- 37 • We find that genetic clusters of cultivars do not reflect their given names and that  
38 there is limited evidence for a reduction in genetic diversity in domesticated  
39 individuals. Admixture has likely occurred multiple times between wild and  
40 domesticated hazelnut. Domesticates appear to have first diverged from their wild  
41 relatives during the Mesolithic.
- 42 • We provide the first genomic assessment of Turkish hazelnut diversity and suggest  
43 that it is currently in a partial stage of domestication. Our study provides a platform  
44 for further research that will protect this crop from the threats of climate change and  
45 an emerging fungal disease.

46

47

48 Keywords: *Corylus avellana* (hazelnut), crop genetics, domestication, gene flow, genetic  
49 diversity, phylogenetics, Turkey.

50

## 51 INTRODUCTION

52 Understanding genetic diversity in crop plants and their wild relatives is critical for  
53 improving breeding programmes (Zamir, 2001), combatting disease (Zhu *et al.*, 2000) and  
54 determining the impact of domestication (Wright, 2005). Advances in genomic sequencing  
55 and the generation of reference genomes have helped identify genetic variation associated  
56 with phenotypes important for agriculture (Bevan *et al.*, 2017). Such approaches have been  
57 used to uncover the history and diversity of model crop species such as rice (He *et al.*, 2011)  
58 and maize (van Heerwaarden *et al.*, 2011). However, methods are available that can be used  
59 in non-model crop species to sequence across the entire genome cheaply and efficiently  
60 (Andrews *et al.*, 2016). This has unlocked the potential for genomic studies in non-model  
61 crop species such as the Scarlett runner bean, *Phaseolus coccineus* (Guerra-García *et al.*,  
62 2017) and the curcubit bottle gourd, *Lagenaria siceraria* (Xu *et al.*, 2013). These approaches  
63 can be applied to crops that may not be widely cultivated but are critical to the economies and  
64 communities of developing regions. Improving our understanding of genetic diversity with  
65 genomic data can kick-start research towards crop improvement that will have a real and  
66 lasting impact on farmers and communities. One such economically important yet  
67 understudied crop is the European hazelnut, *Corylus avellana* L.

68  
69 *Corylus avellana* is a hermaphroditic, self-incompatible shrub that is typically clonally  
70 propagated (Molnar, 2011). The nut of *C. avellana* is one of the most valuable tree nut crops  
71 worldwide yet we have relatively few resources relevant to its improvement as a crop species.  
72 Small proportions of the world's hazelnut production comes from countries such as Spain,  
73 Azerbaijan and the USA while Italy produces approximately 15%. The vast majority, 70-  
74 80%, of the world's hazelnut market is produced in Turkey (Gökirmak *et al.*, 2008). It is  
75 Turkey's largest agricultural export and 61% of the rural Black Sea population rely on  
76 smallholdings of hazelnut for their primary income (Gönenç *et al.*, 2006), making the  
77 performance of the crop critical to the livelihood of the inhabitants of this region. However,  
78 spring frosts and summer droughts regularly reduce hazelnut yields by up to 85% (Ustaoğlu,  
79 2012) and this has knock-on effects on the local economy. Furthermore, a new powdery  
80 mildew disease has emerged in recent years, and is considered by Turkish producers to be the  
81 most significant immediate threat to hazelnut production. The disease is now recognized to be  
82 widespread across the eastern Black Sea region and 60-100% of trees have been found to be  
83 affected in areas close to sea level (Lucas *et al.*, 2018). Despite the economic importance of

84 this tree nut crop and the current threats it faces, we know little about genetic variation in  
85 wild and cultivated forms.

86

87 Previous studies have provided insight into diversity among cultivated and wild hazelnuts  
88 across Europe (e.g. (Boccacci *et al.*, 2006; Gökirmak *et al.*, 2008; Boccacci *et al.*, 2013) as  
89 well as specifically in Turkey (Kafkas *et al.*, 2009; Gürcan *et al.*, 2010; Öztürk *et al.*, 2017),  
90 using a small number of markers. Genome-wide studies have commenced on an American  
91 cultivated strain, primarily to understand resistance to the disease eastern Filbert blight (EFB)  
92 (Rowley *et al.*, 2018). EFB is an important issue in the USA but additional work is needed  
93 where the crop is primarily produced if we are to maximize the social and economic impact  
94 of hazelnut research (Bacchetta *et al.*, 2015).

95

96 In this study we aim to lay the groundwork for a genomic perspective on hazelnut in Turkey.  
97 We conduct double digest restriction-site associated DNA sequencing (Peterson *et al.*, 2012)  
98 on more than 200 individuals, principally wild and cultivated *C. avellana* from the Black Sea  
99 region of Northern Turkey. To provide context in our genomic analyses we also include  
100 specimens from the UK, Georgia and the Campania region of Italy as well as samples from  
101 other members of the same genus, *C. colurna* and *C. maxima*. We use these genomic data to  
102 determine patterns of genetic diversity and structure among and within wild and cultivated  
103 populations.

104

105 Domestication is thought to cause a rapid reduction in population size, when early farmers  
106 isolate a strain, followed by expansion. This ‘domestication bottleneck’ will drastically  
107 reduce levels of genetic diversity (Meyer & Purugganan, 2013) and was thought to be the  
108 norm for cultivated species. However, a relatively long generation time, obligate outcrossing  
109 and clonal propagation may mean that hazelnut does not follow this pattern. Furthermore,  
110 recent publications have also cast doubt on whether this bottleneck is typical of crops.  
111 Emerging evidence suggests that domestication is not a single event but extends over a long  
112 period and that the domestication process does not necessarily result in large reductions in  
113 genetic diversity (Allaby *et al.*, 2019; Smith *et al.*, 2019). Given its life history, the large  
114 number of cultivars (around 400 clonal cultivars have been described (Thompson *et al.*  
115 1996)) and smallholdings that maintain them, hazelnut provides a unique opportunity to study  
116 the effects of domestication on genetic diversity.

117



118 We investigate four main hypotheses surrounding the distribution of genetic diversity in *C.*  
119 *avellana*. We perform clustering analyses and generate summary statistics to test two  
120 hypotheses comparing diversity in wild and domesticated hazelnut : (i) There is more genetic  
121 structure in cultivated than wild populations and (ii) Domesticated hazelnut have reduced  
122 genetic diversity when compared to wild individuals. Before determining how genetic  
123 diversity can best be used for crop improvement it must be defined. We sample more than 50  
124 individuals across 17 of the most common cultivars to test whether (iii) Specimens belonging  
125 to the same cultivar fall into the same genetic clusters. We then use a variety of approaches to  
126 examine test whether (iv) gene flow has occurred between wild and cultivated hazelnut.  
127 Finally, we infer phylogenetic relationships among major groups of wild and cultivated  
128 hazelnut and estimate the timescale of their divergence to uncover when hazelnut  
129 domestication took place.

130

## 131 MATERIALS AND METHODS

### 132 **Sample collection**

133 We sampled putatively wild *Corylus avellana* individuals from 12 sites across Turkey as well  
134 as four sites in Georgia and a single site in the UK. Samples of cultivated individuals were  
135 taken from locations on the north coast of Turkey and from two sites in southern Italy. A map  
136 of collection sites (providing location data were available) in Turkey is shown in Figure 1.  
137 Individuals previously identified as *Corylus colurna* and *C. maxima* were sampled from the  
138 arboretum at Royal Botanic Gardens, Kew. A full list of samples and their collection  
139 locations can be found in Table S1.

140

### 141 **Library Preparation and sequencing**

142 We extracted Genomic DNA using a modified CTAB mini-extraction protocol (Saghai, 1984;  
143 Doyle, 1987). The DNA was then purified using spin columns from the Qiagen DNeasy Plant  
144 Mini Kit and then eluted in 60µl water. ddRAD libraries were prepared following Peterson et  
145 al. 2012. Briefly, 1 µg of DNA was digested at 37C with the restriction enzyme EcoRI-HF  
146 (NEB) for two hours after which MspI (NEB) was added and digestion continued for another  
147 two hours. Barcoded adapters (Peterson *et al.*, 2012) were ligated to 400 ng digested DNA  
148 and samples were pooled. We performed size selection using the Pippin Prep (Sage  
149 Biosciences) with a window of 375 to 550bp. We then ran 10 PCR reactions per library to  
150 minimize the effect of PCR bias. We repeated this process six times and included two  
151 technical replicates each time to check quality across libraries. All libraries were normalised

152 and pooled and then sequenced on four lanes of an Illumina HiSeq 4000 at the Edinburgh  
153 Genomics sequencing facility.

154

### 155 **Locus construction and SNP calling**

156 Loci were constructed using STACKS (v1.46) (Catchen *et al.*, 2011). We used the program  
157 *process\_radtags* in to clean and demultiplex reads (options -c -q & -r). Paired-end reads were  
158 mapped to a new, draft reference genome for the Turkish cultivar ‘Tombul’ (European  
159 Nucleotide Archive (ENA): GCA\_901000735) using the Burrows-Wheeler alignment tool  
160 (BWA) algorithm (Li & Durbin, 2010) BWA-MEM with the default options keeping only  
161 those reads with a mapping quality of 40 or greater. We then used *pstacks* (default  
162 parameters) to extract aligned stacks and identify SNPs. We built a catalogue of consensus  
163 loci by merging alleles (*cstacks*) based on alignment positions (option -g) and with a  
164 maximum of three mismatches allowed between sample loci. We used *sstacks* to search  
165 against this catalogue to match loci from each individual to a catalogue locus, again based on  
166 alignment position. We then used the *populations* program to filter and output data. We  
167 removed loci that were present in less than 75% of individuals and a minor allele frequency  
168 threshold of 0.05 was applied; as output, a VCF file was specified to be used for downstream  
169 analysis. We then ran a preliminary set of analyses (see below) to detect individuals  
170 incorrectly identified as *Corylus*. After this we reran *populations* as above, without  
171 misidentified individuals.

172

### 173 **Population diversity and structure**

174 We first performed a principal components analysis (PCA) on the SNP data generated from  
175 all individuals and then a discriminant analysis of principal components (DAPC) analysis  
176 (Jombart *et al.*, 2010) to cluster individuals. The appropriate number of clusters was inferred  
177 using Bayesian information criterion (BIC). The number of suitable PCs to retain was  
178 identified using the *optim.a.score* function in ‘adegenet’ (Jombart, 2008).

179

180 We then used an alternative clustering approach, fastSTRUCTURE (Raj *et al.*, 2014) on our  
181 SNP dataset. We ran fastSTRUCTURE with the default settings (which account for  
182 admixture) and the simple prior. We used the associated program ‘chooseK.py’ to identify  
183 the number of clusters that best explained the structure in the data and the number that  
184 maximized the marginal likelihood. We ran analyses using all individuals and then just those

185 identified as domesticated individuals from our DAPC analysis. Results were visualised using  
186 the R package ‘pophelper’ (Francis, 2016).

187

188 Finally, we ran fineRADSTRUCTURE (Malinsky *et al.*, 2018), which uses a different  
189 methodology that is based on the fineSTRUCTURE program (Lawson *et al.*, 2012). Test runs  
190 indicated that including some individuals (e.g. distantly related *C. colurna* (not including  
191 ‘E16’, ‘HAO’ or ‘CK1’) individuals and those with high levels of missing data would yield  
192 uninformative results and bias ancestry calculations. These were removed and *populations*  
193 was rerun, leaving 195 individuals for the final analysis. We filtered our input loci by  
194 removing those that had more than 10 SNPs and those that had more than 25% missing data.  
195 We ran fineSTRUCTURE with a burn-in of 100,000 steps and then 100,000 further  
196 iterations, retaining every 1000<sup>th</sup>.

197

198 Summary population genetics statistics were calculated for each cluster inferred using DAPC,  
199 fastSTRUCTURE clusters with mixed ancestry individuals removed (to avoid affects of  
200 potential admixture) and wild vs. cultivated individuals as differentiated by our  
201 fineRADSTRUCTURE analysis. We calculated diversity statistics using functions in the R  
202 packages ‘vcfR’ (Knaus & Grünwald, 2016), ‘adegenet’ (Jombart, 2008), ‘hierfstat’ (Goudet,  
203 2005), ‘poppr’ (Kamvar *et al.*, 2014) and ‘pegas’ (Paradis, 2010).

204

### 205 **Phylogenetic networks and trees**

206 To understand relationships and distances between samples we used SplitsTree4 (Huson &  
207 Bryant, 2005) to infer a phylogenetic network with the neighbour-net algorithm. We used the  
208 program PGDSpider (v2.1.1.5; (Lischer & Excoffier, 2012)) to convert the VCF to phylip  
209 format, which was used as input. We estimated a network using all samples, include those  
210 from *C. colurna* and *C. maxima*.

211

212 We also ran SNAPP (Bouckaert *et al.*, 2014) to infer a coalescent-based species tree based on  
213 binary SNP data. We used the clusters inferred using DAPC as the different taxa. The VCF  
214 file was filtered to remove monomorphic loci and only biallelic SNPs were retained. SNAPP  
215 is extremely computationally intensive, so to reduce the complexity of our dataset we thinned  
216 to SNPs to those with < 3% missing data, used a single SNP per locus and randomly selected  
217 five individuals from each of the inferred population clusters. We included *C. colurna* cluster  
218 as the outgroup and calibrated the tree using the divergence time between *C. colurna* and *C.*

219 *avellana* estimated in Helmstetter et al. (Unpublished). A uniform prior was placed on the  
220 root where upper and lower bounds encompassed the 2.5/97.5% values of the 95% highest  
221 posterior density estimated by Helmstetter et al. (mean = 5.9605, sigma = 0.94). We sampled  
222 every 100 generations until convergence (effective sample sizes (ESS) > 200) was reached  
223 for all parameters. We assessed convergence using ESS values calculated in TRACER (v1.7;  
224 (Rambaut *et al.*, 2018)). This process was repeated to ensure that stationarity was reached at  
225 the same point across different runs.

226

### 227 **Assessing levels of gene flow among genetic clusters**

228 We used TreeMix to infer patterns of population splitting and mixing from allele frequency  
229 data. We calculated allele frequencies for each of the clusters that were identified using  
230 DAPC. We sequentially increased the number of migration events from zero to five (m0-m5)  
231 and examined changes in likelihood with each event added. We also used the ‘-se’ option to  
232 calculate the significance of each migration event. We used two different block sizes (10,  
233 100). We then examined levels of admixture between wild and domesticated clusters using  
234 the D statistic (Patterson *et al.*, 2012) implemented in the program popstats (Skoglund *et al.*,  
235 2015). Significance was calculated using Z scores (D/standard error).

236

## 237 **RESULTS**

### 238 **Sequencing**

239 On average we recovered 8.21 million retained reads (standard deviation 3.72 million) per  
240 sample after processing and cleaning. After identifying and removing incorrectly identified  
241 samples our total dataset consisted of 210 individuals. The total SNPs dataset had 64,509  
242 high quality SNPs with an average depth of 79.1 and 13.53% missing data. The large number  
243 of SNPs called may be, in part, because we had multiple species in our dataset. All sequences  
244 were deposited in the sequence read archive (ENA: PRJEB32239).

245

### 246 **Phylogenetic networks**

247 Our phylogenetic network revealed a clear separation among wild and cultivated individuals  
248 (Fig. 2). Generally there was no clear separation among different Turkish cultivars. We were  
249 able to identify areas where two major Turkish cultivars, ‘Palaz’ and ‘Tombul’ clustered with  
250 other members of the same cultivar. The network revealed a reticulated pattern of branching  
251 that linked groups of domesticated individuals, which suggests there is a large amount of  
252 conflict in the dataset among cultivars when compared to wild samples.

253

254 Distinct groups were more easily distinguishable in wild Turkish individuals. We recovered  
255 three major groups corresponding to three different areas of collection, Bolu, Giresun and  
256 Ordu (Fig. 2). Samples from Giresun and Ordu were each split into two different groups,  
257 indicating that there may be some fine scale genetic structure in these regions. There were a  
258 small number of Giresun individuals that fell close to individuals from Ordu, which may  
259 point to exchange of DNA between these adjacent regions. Wild Georgian samples were  
260 distinct from Turkish individuals, towards the outgroup *C. colurna* while our sole wild  
261 individual from the UK was placed in the middle of the split between wild and domesticated  
262 samples. Long branches connected *C. colurna* individuals to the major *C. avellana* group.  
263 Some individuals originally thought to be *C. avellana* clustered with *C. colurna* and we now  
264 consider these as *C. colurna*. Three individuals fell between *C. avellana* and *C. colurna*, one  
265 individual considered to be *C. colurna* (E16), a variety of *C. colurna* var. ‘lacera’ and an  
266 individual thought to be domesticated *C. avellana* of the cultivar ‘Anac Orta’.

267

### 268 **Population structure**

269 We conducted a DAPC on wild and cultivated individuals together (Fig. 3a) and inferred that  
270 six clusters was the optimal number and 13 PCs were retained. Four clusters were made up of  
271 cultivated individuals, two of which were markedly different from the others; cluster six  
272 contained Italian cultivars (referred to as the Italian cluster) and cluster four contained several  
273 individuals of the Turkish cultivar ‘Tombul’ (Turkish cultivars 2, referred to as the ‘Tombul’  
274 cluster). The remaining three clusters were tightly grouped. One of these contained mostly  
275 wild *C. avellana* individuals, regardless of their country of origin, Another was made up of  
276 Turkish cultivars including many ‘Cakildak’ and ‘Palaz’ (Turkish cultivars 3, referred to as  
277 the ‘Cakildak’ cluster). The last cluster of cultivated individuals was a mix of many different  
278 strains (Turkish cultivars 1). Although we refer to some clusters by their most prominent  
279 cultivar, each also contained a mix of different cultivars. We note that the *C. maxima* samples  
280 included in our analysis fell into clusters with cultivated, rather than wild individuals. The  
281 final cluster contained individuals previously identified as *C. colurna* as well as those thought  
282 to belong to some *C. avellana* cultivars e.g. the cultivar ‘Anac Orta’ (referred to as the *C.*  
283 *colurna* cluster) as in our phylogenetic network (Fig. 2). We treat all members of this cluster  
284 as *C. colurna* for downstream analyses. We examined the geographic distribution of the  
285 clusters (Fig. 3b) and this revealed evidence for an East-West division between cultivated  
286 individuals (‘Cakildak’ cluster and Turkish cultivars 1) along the Black Sea coast.

287

288 We performed a similar analysis using the same individuals and fastSTRUCTURE. This  
289 revealed that eight clusters ( $k = 8$ ) best explained the structure in the data. Unlike in the  
290 DAPC, wild *C. avellana* individuals were spread across multiple clusters. Most fell into a  
291 single large cluster (coloured red in Fig. 4c), while groups of individuals from Giresun (teal,  
292 Fig. 4c) and samples from Bolu and Giresun (pink, Fig. 4c) also formed distinct clusters of  
293 wild individuals. Like in the DAPC analysis, a separate cluster (orange, Fig. 4c) contained  
294 individuals identified as *C. colurna* grouped with the same additional *C. avellana* cultivars.

295

296 The remaining cultivated individuals were placed into four different clusters. Italian samples  
297 grouped together into a distinct cluster. The largest cultivar cluster (yellow, Fig. 4c) in this  
298 analysis contained ‘Tombul’ individuals in addition to many other cultivars while the  
299 ‘Cakildak’ cluster (green, Fig. 4c) was smaller than in the DAPC analysis. A fourth cluster of  
300 domesticated samples (purple, Fig. 4c) again contained a mix of different cultivars. We then  
301 grouped our fastSTRUCTURE results using our DAPC clusters (Fig. 4d). This revealed that  
302 all fastSTRUCTURE wild clusters belonged to the single DAPC wild cluster. Individuals  
303 belonging to Turkish Cultivars 1 and ‘Tombul’ cluster were grouped in fastSTRUCTURE,  
304 though most individuals with mixed ancestry were in the former cluster (Fig. 4d). The last  
305 major difference between the two analyses was that the ‘Cakildak’ cluster was split in two in  
306 the fastSTRUCTURE analysis (Fig. 4d).

307

308 The main purpose of this analysis was to uncover evidence of mixed ancestry in wild and  
309 domesticated individuals. We detected little evidence for admixture between the *C. colurna*  
310 group and other groups, except for the individual ‘CK1’ which was sampled at Royal Botanic  
311 Gardens, Kew. This specimen was thought to be a variety of *C. colurna* but may instead be  
312 the product of a cross between *C. avellana* and *C. colurna*. We found extensive evidence for  
313 admixture among wild and cultivated *C. avellana*. This was particularly evident in two  
314 cultivar clusters (yellow and purple, Fig. 4c). We also recovered evidence of admixture  
315 between all cultivated clusters, which may be the result of past crosses between cultivars  
316 belonging to different clusters. At the same time, there were many domesticated samples with  
317 ancestry assigned to just a single genetic cluster, showing little evidence for past admixture.

318

319 We also ran a fineRADSTRUCTURE analysis on wild and cultivated individuals. The  
320 inferred coancestry matrix (Fig. S1) split wild and cultivated individuals into two separate



321 groups. Many of the wild individuals showed a similar level of coancestry to one another.  
322 There were a number of small groups of wild individuals that were grouped by their  
323 geographic region – samples from Bolu, Ordu and Georgia shared high levels of coancestry.  
324 Individuals from the DAPC *C. colurna* cluster also stood out and were placed within the  
325 large group of wild individuals, rather than outside as per expectations. There was a much  
326 higher variability in coancestry among cultivated individuals indicating more pronounced  
327 genetic structure. They were split into several large groups that broadly reflected the clusters  
328 inferred using other approaches, but revealed additional fine-scale structure inside of each  
329 group. This approach, alongside others, allowed us to accept our hypothesis that (i) there is  
330 more structure in cultivated than wild populations.

331

### 332 **Diversity among wild and cultivated individuals**

333 We found that observed heterozygosity ( $H_o$ ) was generally higher in cultivated than wild  
334 clusters but estimates of expected heterozygosity ( $H_e$ ) did not follow this pattern (Fig. 5). In  
335 our assessment of DAPC clusters, wild *C. avellana* had the highest estimated  $H_e$ . This was  
336 also true for the largest cluster of wild individuals in our fastSTRUCTURE analysis (Fig. 4c,  
337 5), but the pattern as reversed for the two smaller clusters (Fig. 5). All cultivated clusters had  
338 higher  $H_o$  than wild clusters, across all groups assessed. The ‘Tombul’ DAPC cluster had the  
339 lowest  $H_e$  but in clusters defined by fastSTRUCTURE, one containing ‘Cakildak’ specimens  
340 had lower  $H_e$ . When we compared heterozygosity between wild and cultivated individuals as  
341 split by fineRADSTRUCTURE (Fig. S1), we found that both  $H_o$  and  $H_e$  were similar  
342 between the two groups (Fig. 5). Differences between  $H_o$  and  $H_e$  indicated that cultivated  
343 clusters are typically outbred and wild clusters are inbred. Contrasting patterns of  $H_e$  and  $H_o$   
344 meant that we could not accept our hypothesis that (ii) domesticated hazelnut have reduced  
345 diversity when compared to wild individuals.

346

### 347 **Assessing support for predefined cultivars**

348 We aimed to determine whether inferred genetic clusters of cultivated individuals were  
349 similar to groups defined by cultivar name. We ran fastSTRUCTURE on cultivated  
350 individuals only (‘Tombul’, ‘Cakildak’, Turkish cultivars 1 and Italian clusters from DAPC)  
351 and found evidence for extensive genetic structure. Five clusters (Fig. 4a) best explained the  
352 structure in the data. These clusters broadly reflected those in the DAPC analyses, except that  
353 there were two clusters of mixed cultivars (green and orange, Fig. 4a). Signatures of past  
354 admixture between major genetic clusters was inferred in many domesticated individuals, as

355 in the large scale fastSTRUCTURE analysis. Additionally, there was some evidence of  
356 admixture involving the cluster of Italian samples, notably in individuals clustered with  
357 ‘Tombul’ samples. We then assessed those specimens where the cultivar name information  
358 was available by pooling individuals based on cluster name (Fig. 4b). We examined the  
359 relative proportion of each cluster that made up each cultivar. For all cases in which we had  
360 more than one sample, we found that named cultivars were composed of variation from more  
361 than one cluster. We therefore rejected our hypothesis (iii) that genetic clustering supports  
362 given cultivar names.

363

364

### 365 **Phylogenetic relationships and timing of divergence events**

366 After pruning, our final dataset for phylogenetic tree inference consisted of 472 SNPs. Our  
367 SNAPP analysis reached convergence (all ESS > 200) after approximately 0.5m generations.  
368 The second run converged at the same point after 1m generations, suggesting our results are  
369 robust to different starting states. Our SNAPP tree (Fig. 6a) generally had very high support,  
370 all but a single node had posterior probability > 0.95. Clusters of Turkish cultivars formed a  
371 monophyletic group. The placement of the branch leading to the Italian cultivars was unclear.  
372 It was most frequently placed sister to the wild cluster (posterior probability = 0.49; Fig. 6a)  
373 but the posterior distribution of trees revealed another relatively common topology in which  
374 the Italian cluster was sister to the cluster of wild individuals (Fig. S2), as in our treemix  
375 analysis (Fig. 6b). Given our topological uncertainty in the placement of the Italian cluster  
376 (Fig. S2), we cannot be certain whether Turkish and Italian hazelnut were domesticated in a  
377 single or multiple events. Dating of divergence events indicates that domesticated individuals  
378 split from wild individuals between 9.9-16.9kya. The crown age of Turkish cultivars was 5.3-  
379 10.2kya and the Italian cluster diverged from wild individuals between 6.5-14.9kya.

380

### 381 **Gene flow among genetic clusters**

382 We used treemix to estimate phylogenetic trees with (Fig. 6b) and without (Fig. S3)  
383 migration edges, rooted using the *C. colurna* cluster as an outgroup. The topology of the  
384 treemix trees did not place Italian cultivars sister to wild individuals but instead in a clade  
385 with the rest of the cultivated clusters (Fig. 6b). We sequentially added migration events,  
386 assessing likelihood change at each step (Table. S2) and found that a tree with three  
387 migration events had the highest log-likelihood. The first of these migration events went from  
388 wild *C. avellana* cluster to Turkish cultivars 1, the second from the Italian cluster to the



389 ‘Tombul’ cluster and third from the ‘Cakildak’ cluster to the wild cluster. The point of origin  
390 of a migration event along a branch can indicate whether admixture occurred earlier in time  
391 or from a more diverged population, which was the case for the migration event from the  
392 Italian cluster. Each of the three events highly was significant ( $p < 2.1e-06$ ). The amount of  
393 variance explained was high (98.24%) even without any migration edges and increased until  
394 three migration edges were present, up to 99.98% (Table S2). Matrices of pairwise residuals  
395 are shown in Figure S4.

396

397 We then examined whether gene flow has occurred between the wild cluster and clusters of  
398 Turkish cultivars. We inferred D statistics for three tests (Table S3), two of which had Z  
399 scores  $> 2$ , indicating some evidence for gene flow between the ‘Cakildak’ and wild clusters,  
400 agreeing with our treemix analysis (Fig. 6b). Results from fastSTRUCTURE, treemix and D  
401 statistics indicate that gene flow between wild and domesticated hazelnut has taken place and  
402 we therefore accept our hypothesis (iv).

403

## 404 DISCUSSION

### 405 **Genetic clusters do not match cultivars**

406 All approaches used revealed that there was more pronounced genetic structure in  
407 domesticated than wild hazelnut (Fig. 3, 4, S1). Perhaps the most striking pattern we  
408 recovered was the mismatch between genetic data and named cultivars. We identified five  
409 genetic clusters across all of our cultivated individuals (Fig. 4a). When we grouped  
410 individuals by cultivar name, mean ancestry coefficients were always made up of more than  
411 one genetic cluster. This suggests that inferences from our genomic markers do not reflect the  
412 naming system of Turkish cultivars. This may be because cultivar names are based on traits  
413 that are not correlated with neutral genetic variation, such as kernel size, shape or taste.

414 Morphology has been used to assign Turkish cultivars to three primary groups, primarily  
415 based on nut shape (Kafkas *et al.*, 2009) and these do not correspond to the genetic clusters  
416 we have recovered. Kernels of ‘Yassi Badem’, one of the cultivars that grouped with wild  
417 individuals instead of cultivars in our DAPC, are shaped like almonds and not suitable for  
418 processing. This cultivar was also found to be the most genetically distant by Kafkas *et al.*  
419 (2009) and did group with cultivars rather than wild individuals in our fastSTRUCTURE  
420 analysis (Fig. 4c). It may be that cultivars like ‘Yassi Badem’ have not undergone complete  
421 domestication.

422

423 Our clustering was similar in some aspects to a previous study based on several nuclear  
424 marker types (Kafkas *et al.*, 2009). ‘Tombul’ was split among genetic clusters, a pattern also  
425 recovered in Boccacci *et al.* (2006). This cultivar is the most economically important, and it  
426 has been implied that it ‘Tombul’ nuts are from just a single clone (Ayfer *et al.* 1986;  
427 Caliskan, 1995) but this is not supported by the genetic variation within ‘Tombul’ we  
428 recovered. Furthermore, morphological differences in their nuts and husks have been  
429 observed between different ‘Tombul’ samples (Kafkas *et al.*, 2009), even while they are still  
430 marketed under a single epithet. Kafkas *et al.* (2009) suggested that Turkish cultivars should  
431 be considered as groups of clones with similar phenotypes. Our clustering approach also  
432 allows them to be considered by their genetic diversity and shared ancestry. The five clusters  
433 of cultivars we inferred provide a helpful starting point for understanding the partitioning of  
434 genetic variation across Turkish hazelnut plantations, particularly in light of the potential  
435 incompatibilities that could prevent crossing of closely related cultivars. Further work could  
436 investigate if any phenotypic traits are associated with these five groups to continue to pave  
437 the way for crop improvement.

438

#### 439 **Variable distance between domesticated and wild hazelnut**

440 Our DAPC analysis revealed that most cultivated clusters fall close to wild clusters (Fig. 3),  
441 an inference that is supported by the work of Ozturk *et al.* (2017). These patterns could be the  
442 result of local domestication, though we think this is unlikely as we would have expected  
443 wild and cultivated individuals to cluster together geographically. The ‘Tombul’ and Italian  
444 clusters were highly differentiated from other groups in our DAPC (Fig. 3a). Italian cultivars  
445 are geographically isolated from Turkish samples as they occur more than 1,500km away,  
446 which may explain their differentiation. Boccacci & Botta (Boccacci & Botta, 2009) found  
447 little evidence of gene flow from east (Turkey/Iran) to West (Italy/Spain), which supports the  
448 differentiation we uncovered. However, we do find some evidence for admixture (Fig. 4, 6b)  
449 suggesting that some of the genomes of present day Turkish and Italian cultivars may be  
450 the result of past introgression.

451

452 The geographic distribution of ‘Tombul’ overlaps with other Turkish cultivars yet it still  
453 remains highly differentiated (Fig. 3a), which may be indicative of more considered breeding  
454 efforts to improve the cultivar. This cluster also had the lowest level of  $H_e$  among the six  
455 DAPC clusters, suggesting individuals within the cluster are comparatively similar and that  
456 this group may consist of only a small number of clones. ‘Tombul’ nuts are considered to be

457 the highest quality so any hybrids may be weeded out by farmers to protect the cultivar.  
458 Alternatively, the quality of the nuts may mean that ‘Tombul’ is often planted in new areas  
459 where it has not yet had time to interact with local wild relatives. Either way, farmers could  
460 be maintaining the distinction between ‘Tombul’ and other cultivars.

461

#### 462 **Evidence for gene flow among wild and cultivated samples**

463 We identified two potential instances of past gene flow between wild and domesticated *C.*  
464 *avellana* (Fig. 6b). These were supported by extensive admixture in our clustering analysis  
465 (Fig. 4c). However only gene flow between ‘Cakildak’ and wild *C. avellana*, was also  
466 supported by D statistic tests. This event was recovered in our treemix analysis (Fig. 6b) and  
467 we found some evidence for admixture between wild and ‘Cakildak’ in our fastSTRUCTURE  
468 analysis (Fig 4c), which also pointed to extensive admixture between wild *C. avellana* and  
469 individuals belong to other cultivars. We also inferred an admixture event between ‘Tombul’  
470 and Italian clusters (Fig. 6c), but was poorly supported by fastSTRUCTURE (Fig. 4a).  
471 Overall we have found a complex pattern of recent gene flow between wild and domesticated  
472 *C. avellana*.

473

474 Crop-to-wild gene flow poses risks relating to the fitness of local wild populations as it can  
475 have negative ecological and evolutionary consequences and in some cases even lead to  
476 extinction of the wild relative (Ellstrand *et al.*, 1999). Conversely, wild-to-crop gene flow  
477 may lead to poorer yields if genetic variation underlying traits that have been targeted by  
478 breeders is lost. We used a variety of approaches that indicated that introgression - among  
479 different cultivars and between wild and domesticated populations - has played a role in  
480 generating the diversity we see in domesticated hazelnut in Turkey today. Understanding  
481 gene flow between crops and their wild relatives is critical for protecting the local  
482 environment and nearby agriculture; our results should prove useful in assessing the impact  
483 of these processes in hazelnut.

484

#### 485 **A timescale for hazel domestication**

486 Historical documentation of hazel domestication leaves an incomplete picture. As Boccacci  
487 & Botta (2009) pointed out, Pliny the Elder (23–79 A.D.) wrote in his work *Naturalis*  
488 *Historia* that the hazelnut came from Asia Minor and Pontus. In the present day, these areas  
489 are found on the north coast of Turkey, where our study primarily takes place. The current

490 distribution of *C. avellana* was realised about 7kya, after recolonization following the last  
491 glacial maximum (Huntley & Birks, 1983). Between 9-10kya there was a dramatic increase  
492 in the amount of pollen found across Europe probably because of nuts dispersed by animals  
493 and by human migration. Tribes that existed during the Mesolithic (around 10-6kya) may  
494 have been important in the spread of hazel but there is no evidence that they cultivated the  
495 plant (Tallantire, 2002).

496

497 Our own estimates of the split of cultivated *C. avellana* individuals in Turkey from wild  
498 populations (9.9-16.9kya) overlaps with the potential role of early humans in spreading the  
499 plant, and may point to propagation. Archaeologists have found an abundance of nutshell  
500 fragments during this time period that indicates that hazelnuts were consumed by humans  
501 (Bakels 1991; Kubiak-Martens, 1999). It is currently thought that the spread of nuts by  
502 Mesolithic humans was by chance (Kuster 2000), but our dating of cultivars splitting from  
503 wild populations indicates that this may not have been the case. It is thought that interactions  
504 between humans and early crops began in the fertile crescent around 10kya and have  
505 continued until the present (Brown *et al.*, 2009), similar to our results in hazelnut. Therefore,  
506 such an early estimate for the origin of domestication would not be unreasonable and has  
507 been found in other crops outside of the fertile crescent (Zheng *et al.*, 2016).

508

509 Comparisons of sequence data between cultivated and wild individuals can estimate  
510 divergence times that predate the origin of the cultivar and are instead closer to the most  
511 recent common ancestor for the species (Kim *et al.*, 2010; Morrell *et al.*, 2011). However, our  
512 estimates appear to be too young for a common ancestor of *C. avellana*. Alternatively,  
513 changes in generation times through agriculture and strong artificial selection may also  
514 change rates of molecular evolution and thus skew divergence times, so our results must be  
515 taken with caution. Nevertheless, our estimates suggest that the origin of hazelnut cultivation  
516 could predate the Romans and highlights the potential role of Mesolithic tribes in early  
517 hazelnut domestication.

518

### 519 **Hazelnut is still in the early stages of domestication**

520 Cultivars are typically expected to have lower levels of genetic diversity (Tanksley &  
521 McCouch, 1997) because of the bottlenecks caused by domestication (Eyre-Walker *et al.*,  
522 1998) yet we found similar levels of heterozygosity in cultivated compared to wild  
523 individuals. This may indicate that the domestication process is still in its early stages, and

524 that any domestication bottleneck has not had a strong effect on genetic diversity. As *C.*  
525 *avellana* is an obligate outcrosser and self-incompatible, any attempts to augment cultivars  
526 could also increase levels of heterozygosity. Another possibility is that highly heterozygous  
527 individuals have been preferentially retained and clonally propagated in orchards, perhaps  
528 because of increased yields caused by hybrid vigour. Our observations are not entirely  
529 uncommon: cultivated grapevine (Marrano *et al.*, 2017) was more heterozygous than its wild  
530 counterpart and a study using microsatellites found that genetic diversity in hazelnut cultivars  
531 was similar or higher than wild populations in southern Europe (Bocacci *et al.*, 2013).

532

533 While levels of  $H_o$  were lower, levels of  $H_e$  were actually higher in wild *C. avellana* (Fig. 5),  
534 which could point to a reduction of genetic diversity during domestication. We took wild *C.*  
535 *avellana* samples from a wider geographic distribution than cultivated samples and this may  
536 have led to the observed patterns of  $H_e$ . Our comparison of all wild and cultivated samples  
537 (Fig. S1) accounts for this somewhat, and we find that values of  $H_o$  and  $H_e$  are more similar  
538 than when using separated clusters (Fig. 5). Furthermore, small clusters of wild individuals  
539 inferred using fastSTRUCTURE had levels and patterns of heterozygosity similar to their  
540 cultivated counterparts (Fig. 5), so increased  $H_e$  is not always observed for wild individuals.

541

542 Increased heterozygosity is one consequence of introgression and past gene flow between  
543 distinct lineages of wild and domesticated *C. avellana* may have contributed to the high  
544 levels of  $H_o$  we observed across cultivars and in turn mask the signal of a domestication  
545 bottleneck. However, when we calculated heterozygosity after removing admixed individuals  
546 we found very similar results (Fig. 5), which suggests that introgression is likely not driving  
547 the observed pattern in genetic diversity. One of the major concerns for modern day crop  
548 plants is that reduced genetic diversity caused by domestication will limit the potential for  
549 crop improvement in the future (Harlan, 1972). European hazelnut displays relatively high  
550 levels of diversity that is promising both for improvement and for resistance to environmental  
551 stressors such as pathogens or climate change.

552

553 Given the proximity of some wild and domesticated clusters (Fig. 3a), similar levels of  
554 heterozygosity (Fig. 5) and existence of cultivars that group with wild individuals, we suggest  
555 that hazelnut is still in the early stages of domestication. Our results indicate that cultivated  
556 hazelnut may not have experienced a strong domestication bottleneck that reduced genetic  
557 diversity. Our phylogenetic analyses suggest that around 10-15kya have passed since

558 domesticated hazelnut first split from its wild progenitors and about 5-10kya since the  
559 common ancestor of current Turkish cultivars. This lends support to the idea that  
560 domestication has been a gradual process instead of a single event in the past (Brown *et al.*,  
561 2009; Brown, 2019), and the genetic proximity of wild and cultivated samples may suggest it  
562 is still ongoing today. These characteristics make *C. avellana* a useful model for  
563 understanding the genetic effects of partial domestication.

564

## 565 CONCLUSION

566 The European hazelnut is one of the most important tree nut crops worldwide and is a large  
567 part of the economy and livelihood of communities on the north coast of Turkey. We  
568 conducted an assessment of the diversity of cultivars and wild populations in this area and  
569 beyond, the first using a genomic approach. We found that cultivars are highly heterozygous,  
570 and that admixture has likely occurred among wild and domesticated hazelnut as well as  
571 among different genetic clusters of cultivated individuals. We used genomic data to cluster  
572 different cultivars into major groups and, surprisingly, these did not overlap with the current  
573 naming of cultivars. Our efforts could be useful as a starting point for more efficient use of  
574 genetic diversity in breeding programmes. We inferred divergence times of wild and  
575 cultivated groups and have estimated a timeframe that aligns with Archaeological evidence  
576 for hazelnut consumption in Mesolithic tribes. Our assessment of diversity has provided a  
577 new perspective on hazelnut genetics in Turkey and we hope our work will act as a platform  
578 for future studies in this economically important crop plant.

579

## 580 ACKNOWLEDGMENTS

581 We thank Roberta Gargiulo for the collection of Italian cultivars, Kosta Kereselidze for the  
582 collection of Georgian samples and the Hazel Research Centre for providing samples of  
583 Turkish cultivars. This work was funded by the British Council's Newton Fund, grant  
584 number: 216394498.

585

## 586 AUTHOR CONTRIBUTION

587 RJAB and SJL conceived the study, with input from NO and AJH. SJL, NO and AJH  
588 collected samples, NO and AJH conducted molecular lab work. AJH performed data  
589 analyses. AJH wrote the initial draft and all authors provided input thereafter.

590

591 FIGURE LEGENDS

592

593 **Figure 1** (a) Sampling locations of *Corylus avellana* specimens used in this study. Blue  
594 crosses indicate sites where wild individuals were collected and are scaled by number of  
595 individuals. Red crosses indicate sites where cultivated individuals were collected, if the  
596 information was available. Three major provinces of hazelnut production are highlighted. (b)  
597 shows a ripened hazelnut and (c) shows fields of farmed hazelnuts in Giresun. Photo (b) was  
598 taken from wikimedia where it was published under a CC0 license and (c) was taken by AJH.

599

600 **Figure 2** Phylogenetic network calculated using the neighbour-net algorithm across all  
601 individuals. A scale is shown inset. Colours at tips correspond to major collection regions or  
602 species denoted by group labels of the same colour. Areas where samples from two major  
603 Turkish cultivars clustered together are also highlighted.

604

605 **Figure 3** (a) A scatterplot representing showing the locations of wild and cultivated  
606 individuals along the first and second axis of our DAPC analysis. The six inferred clusters are  
607 labelled and shown in different colours. Cluster 1 primarily corresponds to wild individuals  
608 from Turkey, the UK and Georgia. Cluster 2 contains individuals identified as *C. colurna*,  
609 Clusters 3-5 contain Turkish cultivated individuals and cluster 6 is made up of Italian  
610 cultivated individuals. (b) A map of the Turkish provinces Ordu, Giresun and Trabzon is  
611 shown where circles indicate sampling locations (where data was available) and colours  
612 correspond to the clusters inferred in (a).

613

614 **Figure 4** (a) fastSTRUCTURE plot of all cultivated *Corylus avellana* individuals in the  
615 dataset. We found that  $k = 5$  best explains structure in the data, which is used in the figure.  
616 Major cultivar groups are labelled with the dominant cultivars below the plot. (b) The same  
617 analysis as in (a) but individuals with known cultivars are grouped and mean values are  
618 calculated for each group. (c) A fastSTRUCTURE plot of all individuals where  $k = 8$  best  
619 explained the structure in the data. Black dots indicate those individuals initially identified as  
620 domesticated *C. avellana*. Four specific individuals are labelled above the plot. (d) A  
621 fastSTRUCTURE plot as in (c) where individuals are grouped based on DAPC clusters (Fig.  
622 3a), as labelled below the plot.

623



624 **Figure 5** Mean values of expected and observed heterozygosity across all loci (SNPs)  
625 showing standard error. We calculated heterozygosity using three different groupings,  
626 delineated by black bars. From left to right: the first grouping was based on DAPC clustering  
627 (Fig. 3a), the second grouping was based on fastSTRUCTURE clustering and only included  
628 individuals with pure ancestry (no admixture) (Fig. 4c). Colours of x-axis labels correspond  
629 to the colours used in figure 4c. The third grouping was based on the major split between  
630 wild and cultivated individuals in our fineRADSTRUCTURE analysis (Fig. S1).

631

632 **Figure 6** (a) SNAPP tree based on 472 SNPs. Five individuals were randomly selected per  
633 DAPC cluster (Fig. 3a). The tree was time-calibrated based on a secondary calibration and an  
634 axis is shown below the tree. Inferred 95% Highest posterior densities for node ages are  
635 shown as node bars. Branches connected to the root node have been artificially shortened for  
636 clarity, so the time axis does not apply beyond the indicated break points. (b) A maximum  
637 likelihood tree inferred using TreeMix. The optimal set of three admixture events is also  
638 shown on as migration edges, coloured according to their weight, on the tree. Branch lengths  
639 are proportional to the amount of drift in allele frequencies among populations, as indicated  
640 by the scale. The standard error of the sample covariance matrix is also shown.

641



642 REFERENCES

- 643 **Allaby RG, Ware RL, Kistler L. 2019.** A re-evaluation of the domestication bottleneck  
644 from archaeogenomic evidence. *Evolutionary Applications* **12**: 29–37.
- 645 **Andrews KR, Good JM, Miller MR, Luikart G, Hohenlohe PA. 2016.** Harnessing the  
646 power of RADseq for ecological and evolutionary genomics. *Nature Reviews Genetics* **17**:  
647 81–92.
- 648 **Ayfer, M, Uzun, A, Bas, F. 1986.** Turkish Hazelnut Cultivars. Black Sea Region Hazelnut  
649 Exporters Union, Giresun, Turkey.
- 650 **Bacchetta L, Rovira M, Tronci C, Aramini M, Drogoudi P, Silva AP, Solar A, Avanzato**  
651 **D, Botta R, Valentini N, et al. 2015.** A multidisciplinary approach to enhance the  
652 conservation and use of hazelnut *Corylus avellana* L. genetic resources. *Genetic Resources*  
653 *and Crop Evolution*: 1–15.
- 654 **Bakels, CC. 1991.** Western continental Europe. In: van Zeist W, Wasylikowa K, Behre KE,  
655 eds *Progress in old world palaeoethnobotany*. Rotterdam, Netherlands: Balkema, 279–298
- 656 **Bevan MW, Uauy C, Wulff BBH, Zhou J, Krasileva K, Clark MD. 2017.** Genomic  
657 innovation for crop improvement. *Nature* **543**: 346–354.
- 658 **Bocacci P, Botta R. 2009.** Investigating the origin of hazelnut (*Corylus avellana* L.)  
659 cultivars using chloroplast microsatellites. *Genetic Resources and Crop Evolution* **56**: 851–  
660 859.
- 661 **Bocacci P, Akkak A, Botta R. 2006.** DNA typing and genetic relations among European  
662 hazelnut (*Corylus avellana* L.) cultivars using microsatellite markers. *Genome* **49**: 598–611.
- 663 **Bocacci P, Aramini M, Valentini N, Bacchetta L, Rovira M, Drogoudi P, Silva AP,**  
664 **Solar A, Calizzano F, Erdoğan V, et al. 2013.** Molecular and morphological diversity of on-  
665 farm hazelnut (*Corylus avellana* L.) landraces from southern Europe and their role in the  
666 origin and diffusion of cultivated germplasm. *Tree Genetics & Genomes* **9**: 1465–1480.
- 667 **Bouckaert R, Heled J, Kühnert D, Vaughan T, Wu C-H, Xie D, Suchard MA, Rambaut**  
668 **A, Drummond AJ. 2014.** BEAST 2: a software platform for Bayesian evolutionary analysis.  
669 *PLoS computational biology* **10**: e1003537.
- 670 **Brown TA. 2019.** Is the domestication bottleneck a myth? *Nature Plants* **5**: 337–338.
- 671 **Brown TA, Jones MK, Powell W, Allaby RG. 2009.** The complex origins of domesticated  
672 crops in the Fertile Crescent. *Trends in Ecology & Evolution* **24**: 103–109.
- 673 **Caliskan T. 1995.** Findik cesit katalogu. Tarim Koyisleri Bakanligi, Tarımsal Uretim ve  
674 Gelistirme Gen. Mud., Bitkisel Uretim Gelistirme Dairesi Bsk., Ankara.

- 675 **Catchen JM, Amores A, Hohenlohe P, Cresko W, Postlethwait JH, de Koning DJ. 2011.**  
676 **Stacks: Building and Genotyping Loci De Novo From Short-Read Sequences. *G3***  
677 ***Genes/Genomes/Genetics* 1: 171–182.**
- 678 **Doyle JJ. 1987.** A rapid DNA isolation procedure for small quantities of fresh leaf tissue.  
679 *Phytochem. Bull.* **19**: 11–15.
- 680 **Ellstrand NC, Prentice HC, Hancock JF. 1999.** Gene flow and introgression from  
681 domesticated plants into their wild relatives. *Annual Review of Ecology, Evolution, and*  
682 *Systematics* **30**: 539–563.
- 683 **Eyre-Walker A, Gaut RL, Hilton H, Feldman DL, Gaut BS. 1998.** Investigation of the  
684 bottleneck leading to the domestication of maize. *Proceedings of the National Academy of*  
685 *Sciences* **95**: 4441–4446.
- 686 **Francis RM. 2016.** pophelper: an R package and web app to analyse and  
687 visualize population structure. *Molecular ecology resources* **17**: 27–32.
- 688 **Goudet J. 2005.** hierfstat, a package for r to compute and test hierarchical F-statistics.  
689 *Molecular Ecology Notes* **5**: 184–186.
- 690 **Gökirmak T, Mehlenbacher SA, Bassil NV. 2008.** Characterization of European hazelnut  
691 (*Corylus avellana*) cultivars using SSR markers. *Genetic Resources and Crop Evolution* **56**:  
692 147–172.
- 693 **Gönenç S, Tanrıvermiş H, Bülbül M. 2006.** Economic Assessment of Hazelnut Production  
694 and the Importance of Supply Management Approaches in Turkey. *Journal of Agriculture*  
695 *and Rural Development in the Tropics and Subtropics*, **107**:19-32.
- 696 **Guerra-García A, Suárez-Atilano M, Mastretta-Yanes A, Delgado-Salinas A, Piñero D.**  
697 **2017.** Domestication Genomics of the Open-Pollinated Scarlet Runner Bean (*Phaseolus*  
698 *coccineus* L.). *Frontiers in Plant Science* **8**: 4226–15.
- 699 **Gürcan K, Mehlenbacher SA, Erdoğan V. 2010.** Genetic diversity in hazelnut (*Corylus*  
700 *avellana* L.) cultivars from Black Sea countries assessed using SSR markers. *Plant Breeding*  
701 **129**: 422–434.
- 702 **Harlan JR. 1972.** Genetics of Disaster. *Journal of Environment Quality* **1**: 212.
- 703 **He Z, Zhai W, Wen H, Tang T, Wang Y, Lu X, Greenberg AJ, Hudson RR, Wu C-I, Shi**  
704 **S. 2011.** Two Evolutionary Histories in the Genome of Rice: the Roles of Domestication  
705 Genes. *PLoS Genetics* **7**: e1002100.
- 706 **Huntley B, Birks H. 1983.** *An atlas of past and present pollen maps for Europe, 0-13,000*  
707 *years ago*. Cambridge, UK: Cambridge University Press.

- 708 **Huson DH, Bryant D. 2005.** Application of Phylogenetic Networks in Evolutionary Studies.  
709 *Molecular Biology and Evolution* **23**: 254–267.
- 710 **Jombart T. 2008.** adegenet: a R package for the multivariate analysis of genetic markers.  
711 *Bioinformatics* **24**: 1403–1405.
- 712 **Jombart T, Devillard S, Balloux F. 2010.** Discriminant analysis of principal components: a  
713 new method for the analysis of genetically structured populations. *BMC Genetics* **11**: 94.
- 714 **Kafkas S, Doğan Y, Sabır A, Turan A, Seker H. 2009.** Genetic Characterization of  
715 Hazelnut (*Corylus avellana* L.) Cultivars from Turkey Using Molecular Markers.  
716 *HortScience* **44**: 1557–1561.
- 717 **Kamvar ZN, Tabima JF, Grünwald NJ. 2014.** Poppr: an R package for genetic analysis of  
718 populations with clonal, partially clonal, and/or sexual reproduction. *PeerJ* **2**: e281.
- 719 **Kim MY, Lee S, Van K, Kim TH, Jeong SC, Choi IY, Kim DS, Lee YS, Park D, Ma J, et**  
720 **al. 2010.** Whole-genome sequencing and intensive analysis of the undomesticated soybean  
721 (*Glycine soja* Sieb. and Zucc.) genome. *Proceedings of the National Academy of Sciences*  
722 **107**: 22032–22037.
- 723 **Knaus BJ, Grünwald NJ. 2016.** vcfr: a package to manipulate and visualize variant call  
724 format data in R. *Molecular ecology resources* **17**: 44–53.
- 725 **Kubiak-Martens L. 1999.** The plant food component of the diet at the late Mesolithic  
726 (Ertebølle) settlement at Tybrind Vig, Denmark. *Vegetation History and Archaeobotany* **8**:  
727 117–127.
- 728 **Kuster H. 2000.** The history and culture of food and drink in Europe: northern Europe–  
729 Germany and surrounding regions. In: Kiple KF, Ornelas KC, eds. *The Cambridge world*  
730 *history of food, vol 2*. Cambridge, UK: Cambridge University Press, 1226–1232.
- 731 **Lawson DJ, Hellenthal G, Myers S, Falush D. 2012.** Inference of Population Structure  
732 using Dense Haplotype Data. *PLoS Genetics* **8**: e1002453–16.
- 733 **Li H, Durbin R. 2010.** Fast and accurate long-read alignment with Burrows–Wheeler  
734 transform. *Bioinformatics* **26**: 589–595.
- 735 **Lischer HEL, Excoffier L. 2012.** PGDSpider: an automated data conversion tool for  
736 connecting population genetics and genomics programs. *Bioinformatics* **28**: 298–299.
- 737 **Lucas SJ, Sezer A, Boztepe O, Kahraman K, Budak H. 2018.** Genetic analysis of powdery  
738 mildew disease in Turkish hazelnut. *Acta Horticulturae* **1226**:413-320.
- 739 **Malinsky M, Trucchi E, Lawson DJ, Falush D. 2018.** RADpainter and fineRADstructure:  
740 Population Inference from RADseq Data (N Takezaki, Ed.). *Molecular Biology and*  
741 *Evolution* **35**: 1284–1290.

- 742 **Marrano A, Birolo G, Prazzoli ML, Lorenzi S, Valle G, Grando MS. 2017.** SNP-  
743 Discovery by RAD-Sequencing in a Germplasm Collection of Wild and Cultivated  
744 Grapevines (*V. vinifera* L.). *PLoS ONE* **12**: e0170655–19.
- 745 **Meyer RS, Purugganan MD. 2013.** Evolution of crop species: genetics of domestication  
746 and diversification. *Nature Reviews Genetics* **14**: 840–852.
- 747 **Molnar TJ. 2011.** Corylus. Kole C ed. Wild Crop Relatives: Genomic and Breeding  
748 Resources. Berlin, Heidelberg: Springer Berlin Heidelberg, 15–48.
- 749 **Morrell PL, Buckler ES, Ross-Ibarra J. 2011.** Crop genomics: advances and applications.  
750 *Nature Reviews Genetics* **13**: 85–96.
- 751 **Ozkurt, AS. 1950.** Findik ekimi, findiklara zarar veren bocekler mucadelesi, hastaliklari,  
752 tedavisi ve findigin ekonomideki durumu, Tarim Bakanligi, Nesriyet Mudurlugu, Sayi 676.
- 753 **Öztürk SC, Balık Hİ, Balık SK, Kızılcı G, Duyar Ö, Doğanlar S, Frary A. 2017.**  
754 Molecular genetic diversity of the Turkish national hazelnut collection and selection of a core  
755 set. *Tree genetics & genomes* **13**: 113.
- 756 **Paradis E. 2010.** pegas: an R package for population genetics with an integrated-modular  
757 approach. *Bioinformatics* **26**: 419–420.
- 758 **Patterson N, Moorjani P, Luo Y, Mallick S, Rohland N, Zhan Y, Genschoreck T,**  
759 **Webster T, Reich D. 2012.** Ancient admixture in human history. *Genetics* **192**: 1065–1093.
- 760 **Peterson BK, Weber JN, Kay EH, Fisher HS, Hoekstra HE. 2012.** Double Digest  
761 RADseq: An Inexpensive Method for De Novo SNP Discovery and Genotyping in Model  
762 and Non-Model Species. *PLoS ONE* **7**: e37135.
- 763 **Raj A, Stephens M, Pritchard JK. 2014.** fastSTRUCTURE: Variational Inference of  
764 Population Structure in Large SNP Data Sets. *Genetics* **197**: 573–589.
- 765 **Rambaut A, Drummond AJ, Xie D, Baele G, Suchard MA. 2018.** Posterior  
766 Summarization in Bayesian Phylogenetics Using Tracer 1.7. *Systematic Biology* **67**: 901–904.
- 767 **Rowley ER, VanBuren R, Bryant DW, Priest HD, Mehlenbacher SA, Mockler TC.**  
768 **2018.** A Draft Genome and High-Density Genetic Map of European Hazelnut (*Corylus*  
769 *avellana* L.):.
- 770 **Saghai MA. 1984.** Ribosomal DNA spacer-length polymorphisms in barley: Mendelian  
771 inheritance, chromosomal location, and population dynamics. *Proceedings of the National*  
772 *Academy of Sciences* **81**: 8014–8018.
- 773 **Skoglund P, Mallick S, Bortolini MC, Chennagiri N, Hünemeier T, Petzl-Erlor ML,**  
774 **Salzano FM, Patterson N, Reich D. 2015.** Genetic evidence for two founding populations of  
775 the Americas. *Nature Reviews Genetics* **525**: 104–108.

- 776 **Smith O, Nicholson WV, Kistler L, Mace E, Clapham A, Rose P, Stevens C, Ware R,**  
777 **Samavedam S, Barker G, et al. 2019.** A domestication history of dynamic adaptation and  
778 genomic deterioration in Sorghum. *Nature Plants* **5**: 369–379.
- 779 **Tallantire PA. 2002.** The early-Holocene spread of hazel (*Corylus avellana* L.) in Europe  
780 north and west of the Alps: an ecological hypothesis. *The Holocene* **12**: 81–96.
- 781 **Tanksley SD, McCouch SR. 1997.** Seed Banks and Molecular Maps: Unlocking Genetic  
782 Potential from the Wild. *Science* **277**: 1063–1066.
- 783 **Thompson, MM, Lagerstedt, HB, Mehlenbacher, SA. 1996.** Hazelnuts. In: Janick J,  
784 Moore JN, eds. *Fruit breeding: nuts, vol 3*. New York, USA: Wiley, 125–184.
- 785 **Ustaoglu, B. 2012.** Giresun’da İklim Koşulları’nın Fındık (*Corylus avellana*) Verimliliği  
786 Üzerine Etkisi. *Marmara Geographical Journal* (Turkish) **26**: 302-323.
- 787 **van Heerwaarden J, Doebley J, Briggs WH, Glaubitz JC, Goodman MM, de Jesus**  
788 **Sanchez Gonzalez J, Ross-Ibarra J. 2011.** Genetic signals of origin, spread, and  
789 introgression in a large sample of maize landraces. *Proceedings of the National Academy of*  
790 *Sciences* **108**: 1088–1092.
- 791 **Wright SI. 2005.** The Effects of Artificial Selection on the Maize Genome. *Science* **308**:  
792 1310–1314.
- 793 **Xu P, Xu S, Wu X, Tao Y, Wang B, Wang S, Qin D, Lu Z, Li G. 2013.** Population  
794 genomic analyses from low-coverage RAD-Seq data: a case study on the non-model cucurbit  
795 bottle gourd. *The Plant Journal* **77**: 430–442.
- 796 **Zamir D. 2001.** Improving plant breeding with exotic genetic libraries. *Nature Reviews*  
797 *Genetics* **2**: 983–989.
- 798 **Zheng Y, Crawford GW, Jiang L, Chen X. 2016.** Rice Domestication Revealed by  
799 Reduced Shattering of Archaeological rice from the Lower Yangtze valley. *Scientific Reports*  
800 **6**: 613.
- 801 **Zhu Y, Chen H, Fan J, Wang Y, Li Y, Chen J, Fan J, Yang S, Hu L, Leung H, et al.**  
802 **2000.** Genetic diversity and disease control in rice. *Nature* **406**: 718–722.

803

#### 804 SUPPORTING INFORMATION

805 Additional Supporting Information may be found online in the Supporting Information  
806 section at the end of the article.

807

808 **Table S1** Collection sites of samples.

809 **Table S2** Treemix statistics

810 **Table S3** D statistics

811

812 **Fig. S1** fineRADSTRUCTURE coancestry matrix.

813 **Fig. S2** Posterior distribution of trees from SNAPP analysis.

814 **Fig. S3** A maximum likelihood tree inferred using TreeMix with no mixture events.

815 **Fig. S4** Matrices of pairwise residuals from TreeMix analyses.

816

(a)

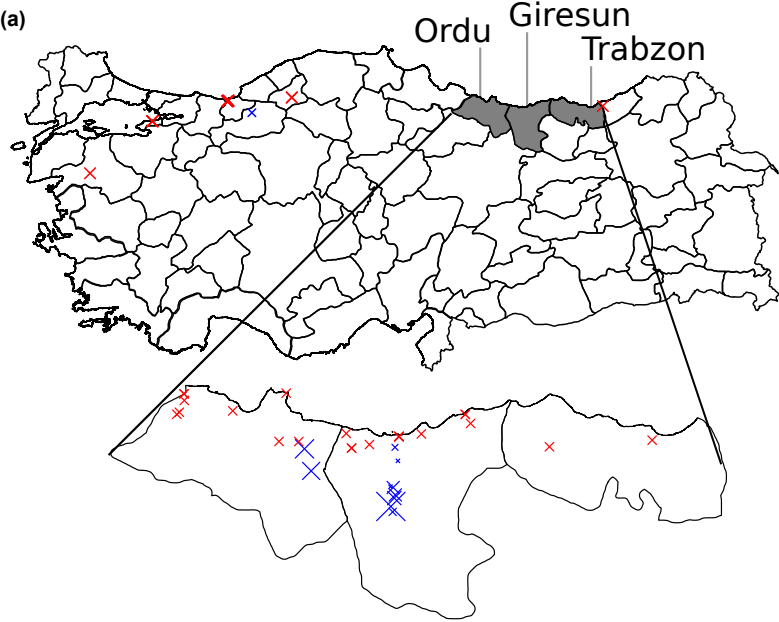

(b)

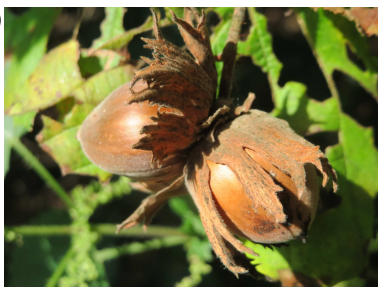

(c)

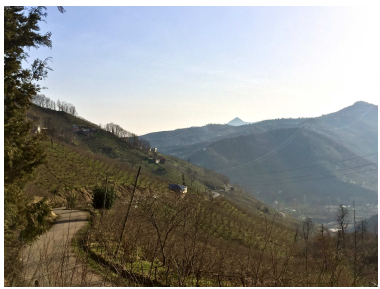







**(a)**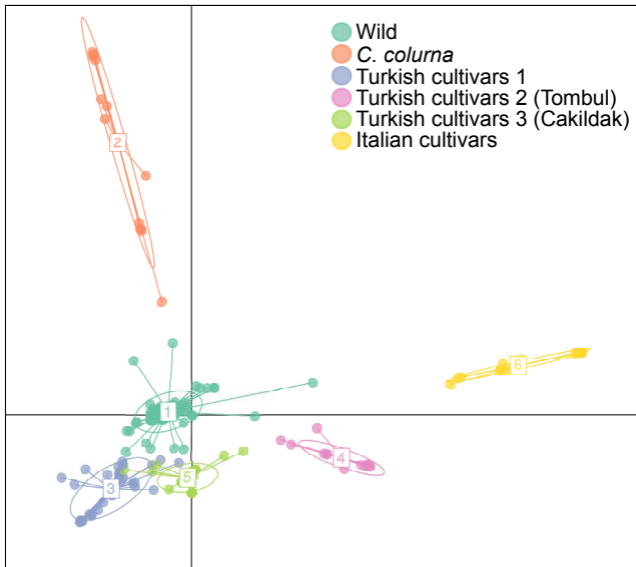**(b)**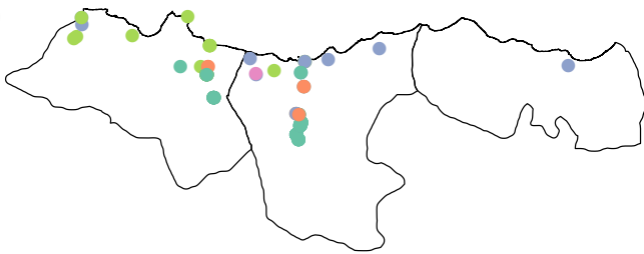



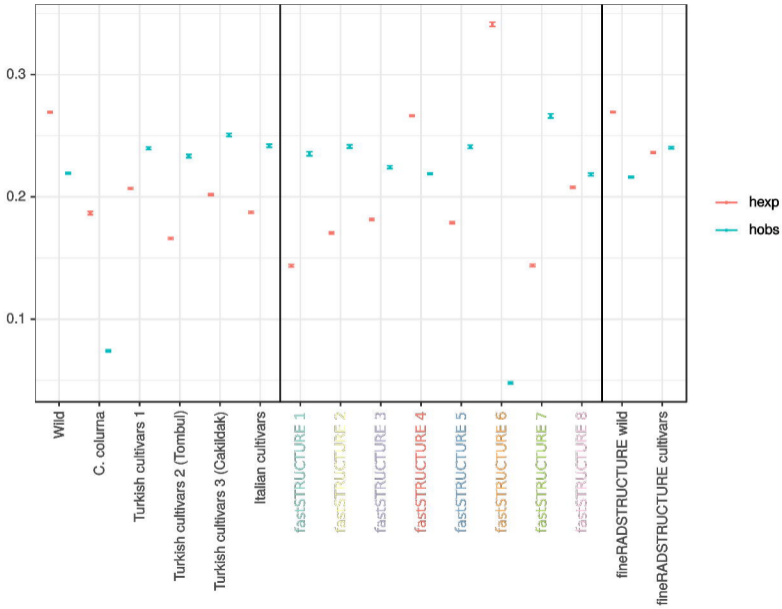

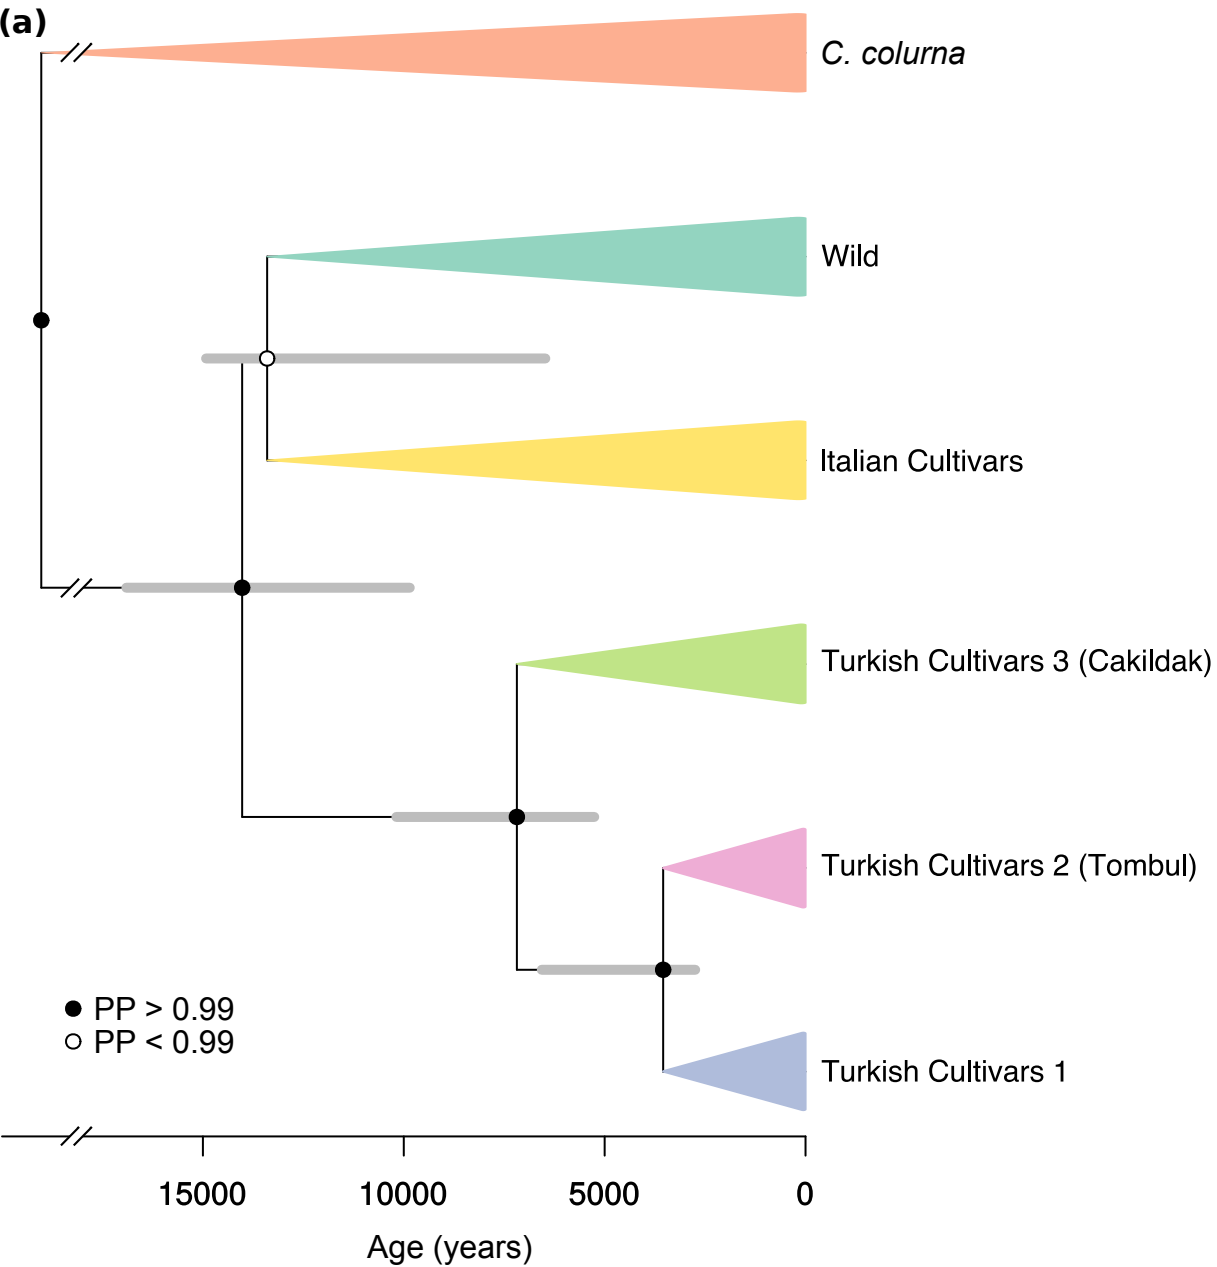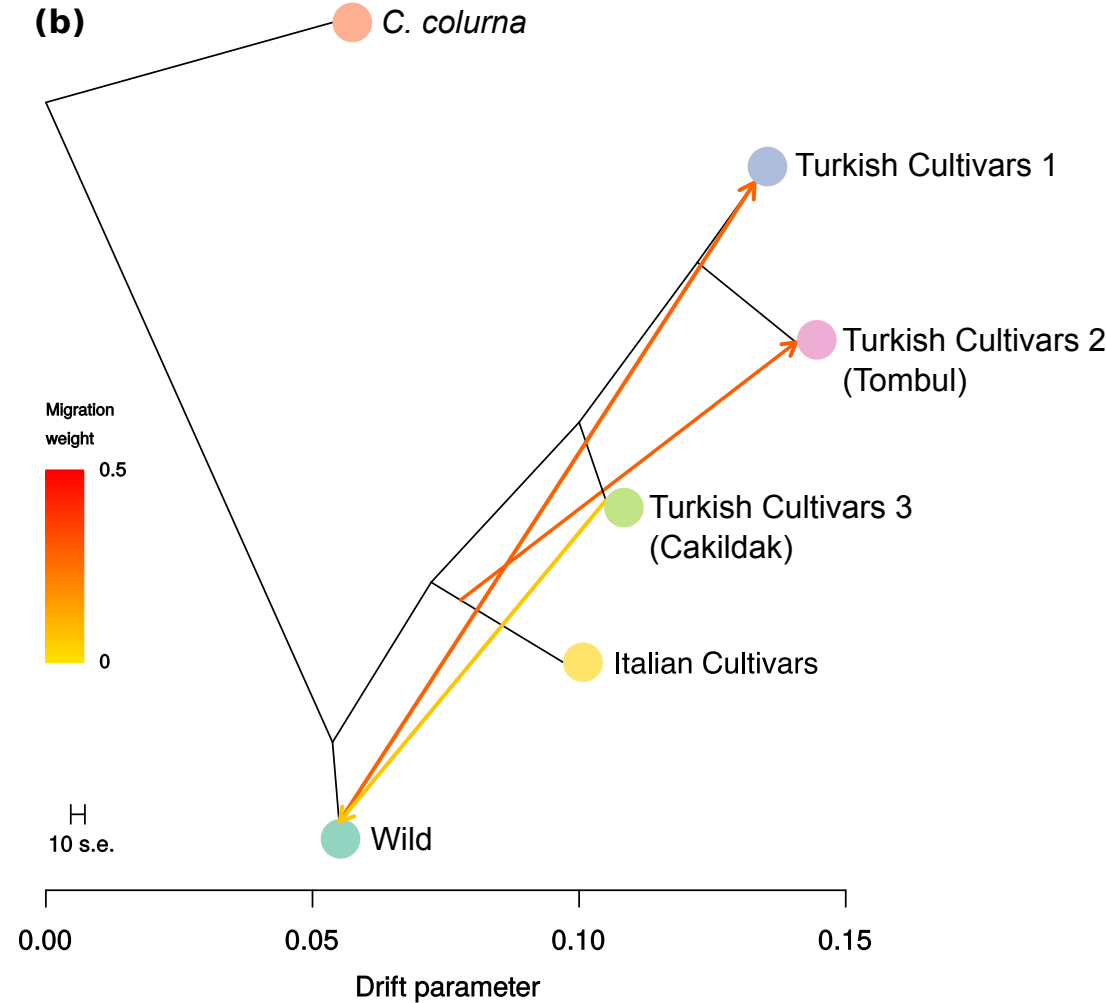

Source: http://biorxiv.org/content/10.1101/622027v1.full.pdf
